# Supplementary material for: Affordable Caenorhabditis elegans tracking system for classroom use
Source: bioRxiv or medRxiv preprint supplement (doi:10.1101/2020.12.28.424585), 2021-02-16
Supplement: Supplementary file [file media-3.pdf]

scope tower 1/2

fold line

remove

D

fold line

USB scope holder (outer 1/2)

USB scope holder (outer 2/2)

Tower brace

E

scope tower 2/2

fold line

remove

I

I

D

fold line

G

remove

USB scope holder (inner)

H

USB light brace 1/2

B

B

USB light brace 2/2

Plate holder 1/2

F

F

Plate holder 2/2

light diffuser

remove

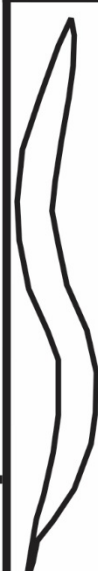

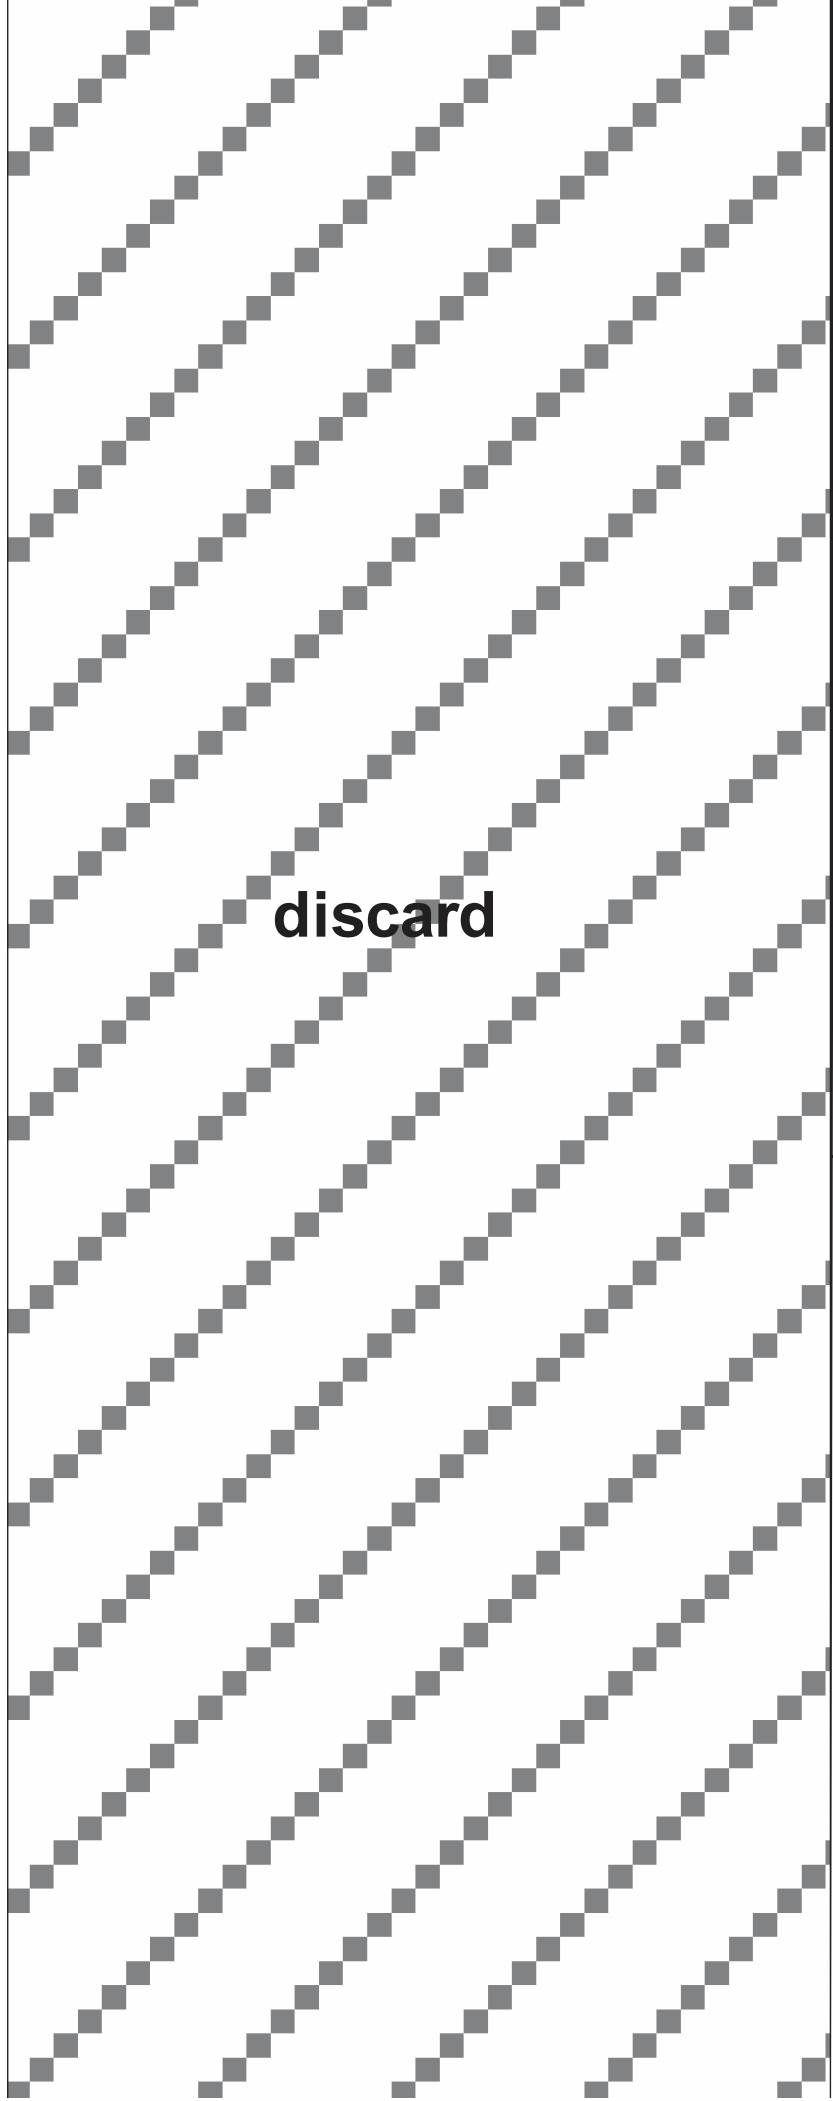

**discard**

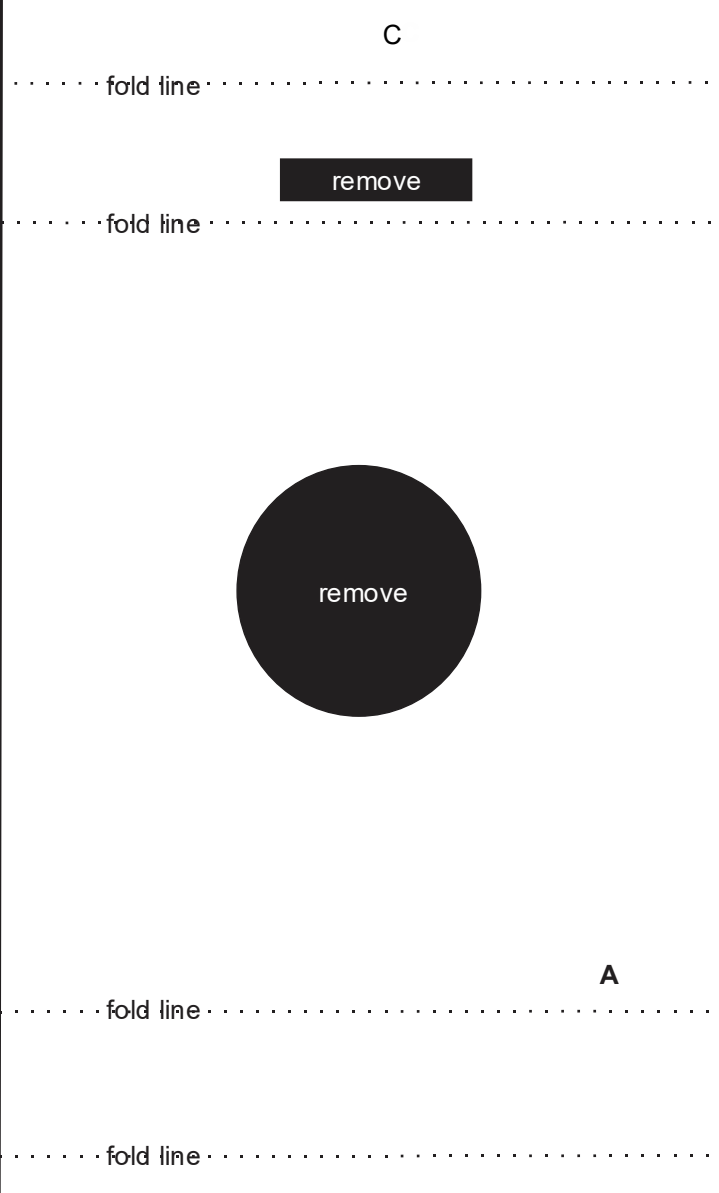

C

fold line

remove

fold line

remove

A

fold line

fold line
